# Supplementary material for: The Hidden Battle: Lived Experiences of Women with Polycystic Ovary Syndrome in Mysuru, India
Source: Research Square preprint supplement (doi:10.21203/rs.3.rs-8485869/v1), 2026-01-06
Supplement: Supplementary file 1 [file d636652c55f733bd90afd8d4.docx]

# COREQ Checklist (Completed)

Manuscript: “The Hidden Battle: Lived Experiences of Women with Polycystic Ovary Syndrome in Mysuru, India”

## Domain 1: Research Team and Reflexivity – Personal Characteristics

| Item No. | COREQ Item | Response | Reported on Page # |
| --- | --- | --- | --- |
| 1 | Interviewer/Facilitator | In-depth interviews were conducted by trained female researchers from the School of Public Health, JSS AHER, under supervision of the principal investigator. | Page 6 |
| 2 | Credentials | Researchers included Assistant Professors, a PhD scholar, and public health professionals with postgraduate qualifications. | Page 1 |
| 3 | Occupation | Faculty members and postgraduate researchers at School of Public Health, JSS AHER, and OBG faculty at JSS Medical College. | Page 1 |
| 4 | Gender | Female | Page 1 |
| 5 | Experience and training | Researchers had prior training and experience in qualitative research, in-depth interviewing, thematic analysis, and use of NVivo software. | Page 6 |

## Relationship with Participants

| Item No. | COREQ Item | Response | Reported on Page # |
| --- | --- | --- | --- |
| 6 | Relationship established | No prior relationship was established with participants before study commencement. | Page 5 |
| 7 | Participant knowledge of interviewer | Participants were informed about the academic purpose of the study, researcher affiliation, and study objectives prior to interviews. | Page 5 |
| 8 | Interviewer characteristics | Researchers maintained reflexivity and neutrality, acknowledging academic interest in women’s health while avoiding assumptions. | Page 6 |

## Domain 2: Study Design

| Item No. | COREQ Item | Response | Reported on Page # |
| --- | --- | --- | --- |
| 9 | Methodological orientation | Qualitative exploratory study using thematic analysis. | Page 5–6 |
| 10 | Sampling | Purposive sampling technique. | Page 5 |
| 11 | Method of approach | Participants were approached face-to-face at the tertiary care hospital. | Page 6 |
| 12 | Sample size | Nine participants. | Page 7 |
| 13 | Non-participation | No refusals or dropouts were reported; recruitment continued until data saturation. | Page 5 |
| 14 | Setting of data collection | Private rooms within a tertiary care hospital in Mysuru. | Page 6 |
| 15 | Presence of non-participants | The interview involved a minor; therefore, parental presence was permitted as an ethical safeguard, with the parent remaining non-participatory and not influencing the participant’s responses. | Page 6 |
| 16 | Description of sample | Demographic and socioeconomic characteristics described. | Page 7 |

## Data Collection

| Item No. | COREQ Item | Response | Reported on Page # |
| --- | --- | --- | --- |
| 17 | Interview guide | Semi-structured, pretested, and content-validated interview guide. | Page 6 |
| 18 | Repeat interviews | No repeat interviews conducted. | NA |
| 19 | Audio recording | Interviews were audio-recorded with participant consent. | Page 6 |
| 20 | Field notes | Field notes were not systematically recorded. | NA |
| 21 | Duration | Each interview lasted 30–45 minutes. | Page 6 |
| 22 | Data saturation | Data collection continued until thematic saturation. | Page 5 |
| 23 | Transcripts returned | Interview transcripts were not returned to participants, as the study focused on capturing collective thematic experiences rather than individual case verification. | Page 6 |

## Domain 3: Analysis and Findings

| Item No. | COREQ Item | Response | Reported on Page # |
| --- | --- | --- | --- |
| 24 | Number of data coders | Two researchers independently coded the data. | Page 28 |
| 25 | Coding tree | Codes were developed inductively into themes and sub-themes. | Page 6 |
| 26 | Derivation of themes | Themes were derived inductively from the data. | Page 5 |
| 27 | Software | NVivo version 15 software used. | Page 6 |
| 28 | Participant checking | Participant validation was not conducted. | Page 6 |
| 29 | Quotations presented | Verbatim anonymized quotations included. | Page 8–16 |
| 30 | Data and findings consistent | Findings were consistent with participant narratives. | Page 7–16 |
| 31 | Clarity of major themes | Major themes clearly presented. | Page 7–16 |
| 32 | Clarity of minor themes | Diverse participant perspectives discussed. | Page 16–18 |
